# Supplementary material for: Toxoplasma TgAtg8-TgAtg3 Interaction Primarily Contributes to Apicoplast Inheritance and Parasite Growth in Tachyzoite
Source: PubMed Central journal article supplement (PMC8865545; doi:10.1128/spectrum.01495-21), 2022-02-23
Supplement: spectrum01495-21_supp_1_seq10.pdf [file spectrum01495-21_supp_1_seq10.pdf]

## Tables

**Table S1. Primers used in this study**

| Primer name | Sequence                                                                                                                                 | product sizes<br>(bp)                              |
|-------------|------------------------------------------------------------------------------------------------------------------------------------------|----------------------------------------------------|
| P1          | CGTCTGTCTTCAACCAGATCTATGACGAAGCCTCAAGAGACAC                                                                                              | 1416                                               |
| P2          | AGCTCCACCGCGGTGGCGGCCGCGCATGCCATTACTACACATCAGA                                                                                           |                                                    |
| P3          | TCTCGTTTCGCTCAAAGTGTG                                                                                                                    | P3/P4 : 1775<br>P3/P5 : 1715<br>P6/P4 : 1744       |
| P4          | CCTTCCTTTGGTGGATCAGTC                                                                                                                    |                                                    |
| P5          | CTGCAAGGCGATTAAGTTGG                                                                                                                     |                                                    |
| P6          | GAAACATCGTGAGGCTGGTAC                                                                                                                    |                                                    |
| P7          | GACCTGGCCATGGCCATGCATTACCCGTACGACGTCCCGGACTACGCTTAT<br>CCCTATGATGTGCCCGATTATGCGTATCCTTACGATGTTCCAGATGCTGCAG<br>CAATGACGAAGCCTCAAGAGACACC |                                                    |
| P8          | TGAGCACAACGGTGATTAATTAATACTTCTCGTTTTTTGACTGCGG                                                                                           | 1281                                               |
| P9          | GGCGAATTGGGTACCGGGCCCGTGCCTAGTATCGAAAGCTGTAG                                                                                             | 971                                                |
| P10         | GACGTCGTACGGGTAATGCATTTTAGAAGCCCTGTGGACAG                                                                                                |                                                    |
| P11         | AAAAACGAGAAGTAGTTAATTAAGTCTCTAGTTTTTTTGGACAGACCG                                                                                         | 889                                                |
| P12         | AGTGACACCGCGGTGGCGGCCGAGAGAAGTTGTGTGCTAGAGGTTTC                                                                                          |                                                    |
| P13         | GTGCCTAGTATCGAAAGCTGTAG                                                                                                                  | 3173                                               |
| P14         | AGAGAAGTTGTGTGCTAGAGGTTTC                                                                                                                |                                                    |
| P15         | GCGATTCCCGTATTGGTC                                                                                                                       | 1492                                               |
| P16         | GTTCTGCGGATGGTGAG                                                                                                                        |                                                    |
| P17         | CTGCTTTCGTCTGTCTTC                                                                                                                       | P17/P18 : 1554<br>P19/P18 : 1556<br>P19/P20 : 1565 |
| P18         | CAAATGGCTATGTTGCGC                                                                                                                       |                                                    |
| P19         | CAAACCCAGATATTCGCC                                                                                                                       |                                                    |
| P20         | TACGACTCACTATAGGGC                                                                                                                       |                                                    |
| P21         | GTATCCCAACGAAATTCGGTTCATCTGC                                                                                                             |                                                    |
| P22         | TTTGCCCGAATGCGGTGT                                                                                                                       | 9681                                               |
| P23         | AGTTTCACCTCTGCCCCGA                                                                                                                      | 124                                                |
| P24         | CTACGCCTTTCCACTGCCA                                                                                                                      |                                                    |
| P25         | CATCTGCGAAAAAGCTCCCC                                                                                                                     | 195                                                |
| P26         | GCCTTCGGTGCCGTATTTTC                                                                                                                     |                                                    |
| P27         | ATGTTCCGTGGTTCGCATGT                                                                                                                     | 104                                                |
| P28         | TTCATGTTGTTGGGAATCCAC                                                                                                                    |                                                    |

**Table S2. The antibodies used throughout this study are indicated.**

| <b>Antibodies</b>                        | <b>Dilutions</b>              | <b>Sources</b>                    |
|------------------------------------------|-------------------------------|-----------------------------------|
| Rabbit anti-TgAtg8                       | 1:500 for WB and IFA          | Laboratory-prepared               |
| Rabbit anti-TgAtg3                       | 1:1000 for WB; 1:200 for IFA  | Laboratory-prepared               |
| Mouse anti-Tg $\beta$ Tubulin            | 1:1000 for WB                 | Laboratory-prepared               |
| Mouse anti-TgCpn60                       | 1:200 for IFA                 | Laboratory-prepared               |
| Mouse anti-TgSAG1                        | 1:2000 for WB and IFA         | Abcam, ab8313                     |
| Rabbit anti-HA                           | 1:2000 for WB; 1:1000 for IFA | Cell Signalling Technology, 3724S |
| Goat anti-rabbit IgG (H+L), HRP-Labelled | 1:5000 for WB                 | Biosharp, BL003A                  |
| Goat anti-mouse IgG (H+L), HRP-Labelled  | 1:5000 for WB                 | Biosharp, BL001A                  |
| Goat anti-mouse Alexa Fluor 488          | 1:1000 for IFA                | YEAST, 33106ES60                  |
| Goat anti-rabbit Alexa Fluor 546         | 1:1000 for IFA                | YEAST, 33112ES60                  |

## Figures

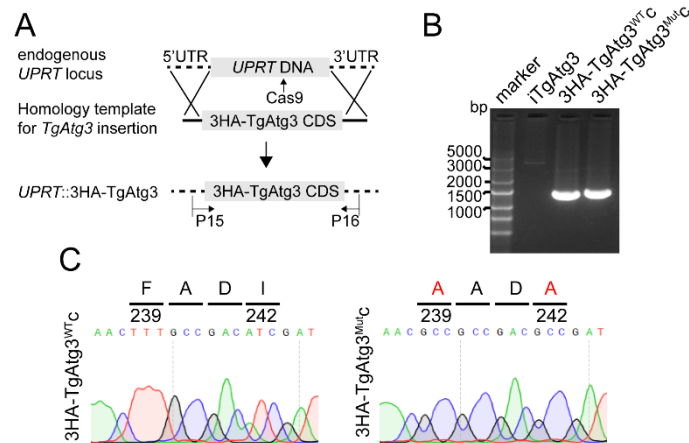

**FIG S1** Validation of two *TgAtg3* complemented lines. (A) Schematic representation of generation of the  $3\text{HA-TgAtg3}^{\text{WTc}}$  and  $3\text{HA-TgAtg3}^{\text{Mutc}}$  complemented cell lines by replacement of the endogenous *UPRT* locus. P15 and P16 represent the primer binding sites in the complemented lines (B) Clone derived from the stable FUDR-resistant population was detected for the recombined loci by using diagnostic PCR. *iTgAtg3* line is used as control. (C) Sequencing validation of the PCR products from panel A.

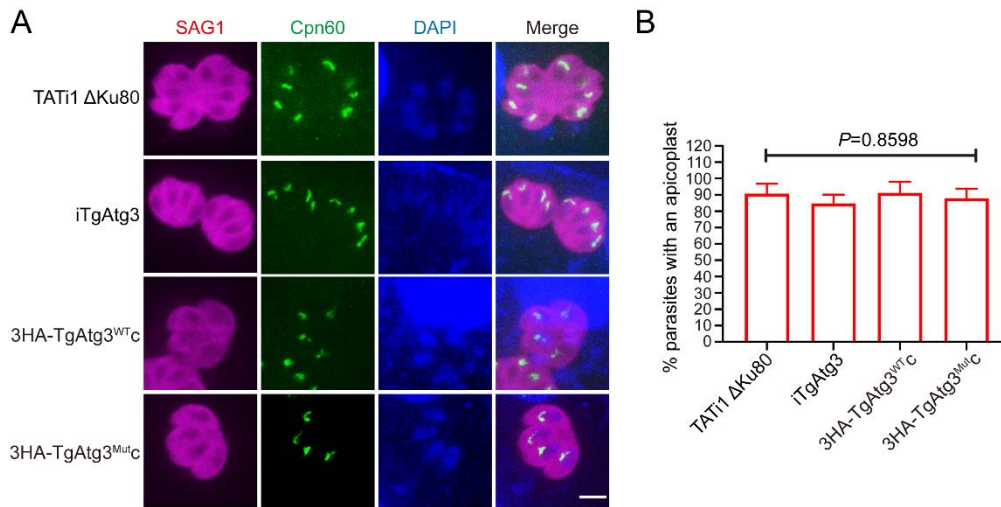

**FIG S2** TgAtg8-TgAtg3 interaction regulates apicoplast inheritance. (A) IFA assay for detection of the apicoplast marker TgCpn60 in HFFs infected with each line in the absence of ATc for 48 h. Scale = 5 $\mu$ m. (B) Quantification of the percentages of tachyzoites with an apicoplast in the absence of ATc for 48 h. Data are means  $\pm$  SEM from three biologic replicates, each with at least 200 parasites per line counted. Statistical analysis was done using one-way ANOVA.

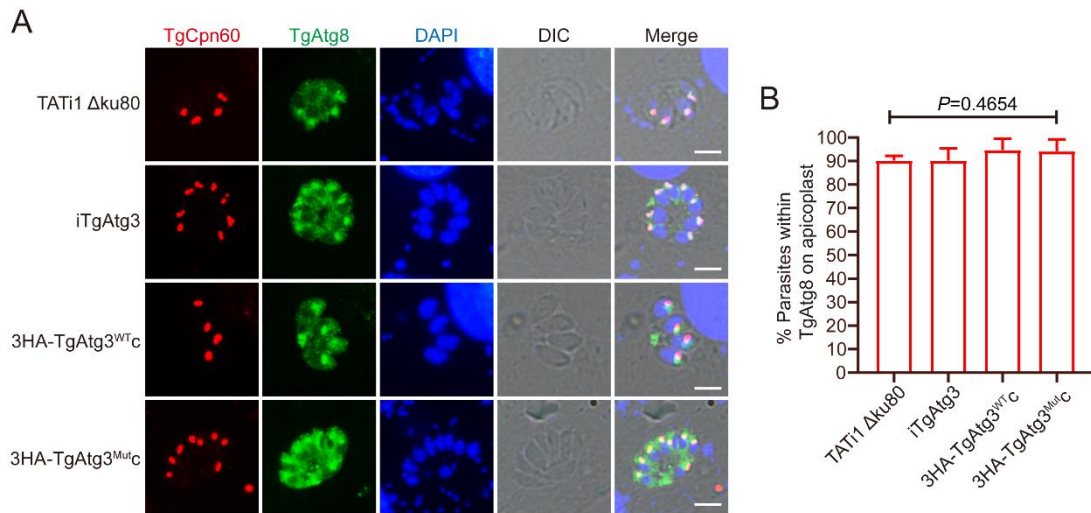

**FIG S3** TgAtg8-TgAtg3 interaction regulates TgAtg8 apicoplast localization. (A) IFA was performed to observe TgAtg8 localization in the absence of ATc for 48 hours. Scale = 5 $\mu$ m. (B) The number of apicoplast-bearing parasites that displayed the presence of TgAtg8 on apicoplast. Data are means  $\pm$  SEM from two biologic replicates. Statistical analysis was done using one-way ANOVA.

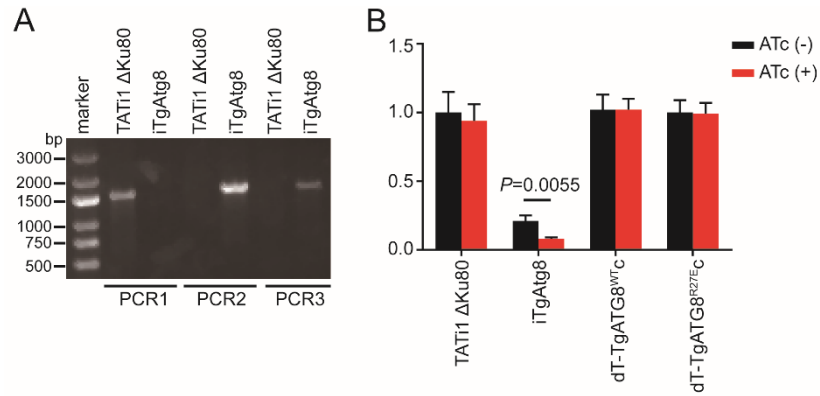

**FIG S4** Generation of iTgAtg8 and complemented lines. (A) Clone derived from a stable pyrimethamine-resistant population was detected for the endogenous and recombined loci by using diagnostic PCR. TATI1  $\Delta$ Ku80 line is used as control. (B) RT-qPCR analyses of *TgAtg8* transcriptional level in each line preceded or not by 48 hours of induction with ATc to regulate expression.
